# Supplementary material for: hCLP46 increases Smad3 protein stability via inhibiting its ubiquitin-proteasomal degradation
Source: PubMed Central journal article supplement (PMC4598319; doi:10.1007/s13238-015-0174-0), 2015-06-10
Supplement: 13238_2015_174_MOESM1_ESM.pdf [file 13238_2015_174_MOESM1_ESM.pdf]

## SUPPLEMENTARY MATERIALS

### **hCLP46 enhances TGF- $\beta$ signaling by increasing Smad3 protein stability**

Yingying Xing<sup>1#</sup>, Qiaoyun Chu<sup>1, 2#</sup>, Run Feng<sup>1</sup>, Wei Wang<sup>3</sup>, Lixin Liu<sup>1, 4\*</sup>, Zhongbing Lu<sup>1\*</sup>

<sup>1</sup> College of Life Sciences, University of Chinese Academy of Science, Beijing, 100049, China

<sup>2</sup> Department of Biochemistry and Molecular Biology, Capital Medical University, Beijing, 10069, China

<sup>3</sup> School of Medical Science, Edith Cowan University, Joondalup, WA, 6027, Australia

<sup>4</sup> Key Laboratory for Polymeric Composite and Functional Materials of Ministry of Education, School of Chemistry and Chemical Engineering, Sun Yat-Sen University, Guangzhou, 510275, China

# These authors contributed equally to this work

\* Corresponding author:

Lixin Liu, PhD

School of Chemistry and Chemical Engineering, Sun Yet-sen University

NO. 135, Xingang Xi Road, Guangzhou, 510275, China

Tel. +86 15622237496; Fax +86 2084113261

Email: [liulixin@mail.sysu.edu.cn](mailto:liulixin@mail.sysu.edu.cn)

Or

Zhongbing Lu, Ph.D

College of Life Science, University of Chinese Academy of Science

19A Yuquanlu, Beijing, 100049, China

Fax: 86(10)88256079; Tel: 86(10)88256713

E-mail: [luzhongbing@ucas.ac.cn](mailto:luzhongbing@ucas.ac.cn)

## Material and methods

The plasmid encoding hCLP46 open reading frame (ORF), hCLP46-specific siRNA and control siRNA were produced as previously described (Ma et al., 2011). The DNA sequence encoding the 1-120aa and 121-392aa of hCLP46 were amplified by PCR and inserted into the pcDNA4/TO/Myc vector (Invitrogen, Carlsbad, CA, USA) using BamHI and XhoI sites incorporated into primers (underlined). *For 1-120, forward primer: 5'-AAA GGATCC GCCACCATGGAGTGGTGGGCTAGC-3, reverse primer: 5'-AGA CTCGAG CGCCCGATCACTTCCAAAAT-3. For 121-392, forward primer: 5'-AAA GGATCC GCCACC ATG CGTCTCCCTGACATG-3, 5-5'-AGA CTCGAG CTACAGATCCTCTTCTGAGAT-3.* DAPT (N-[N-(3,5-difluorophenacetyl)-1-alanyl]-S-phenylglycine t-butyl ester) and MG132 were purchased from Sigma Chemical Co. (St. Louis, MO, USA). Cycloheximide (CHX) and TGF- $\beta$ 1 were purchased from Cayman Chemical Co. (Ann Arbor, MI, USA) and PeproTech Inc. (Rocky Hill, NJ, USA) respectively. Antibodies against the following proteins were used: Smad3, ubiquitin, p21, p27,  $\beta$ -tubulin and Myc-tag (Cell Signaling Technology, Danvers, MA, USA).

### Cell culture, transfections and growth assay

Cells were cultured in Dulbecco's modified Eagle's medium (DMEM; Gibco BRL, Gaithersburg, MD, USA) supplemented with 10% FBS and maintained at 37 °C under humidified conditions and 5% CO<sub>2</sub>. Plasmids and siRNA were transfected using Lipofectamine 2000 (Invitrogen) according to the manufacturer's instructions. MTT method was used for cell growth assay as previous reported (Chu et al., 2013).

### Gene expression analysis with quantitative real-time PCR

Total RNA was extracted from cells using Trizol reagent, and cDNA was synthesized with SuperScript III First-Strand Synthesis Super-Mix for quantitative PCR (Invitrogen). The primers used are as follows: hCLP46: forward 5'-GATATCATGTATCCTGCTTG-3'; reverse 5'-TTTTCCATGGCCACTGTGCTG-3'. Smad3: forward 5'-AAACCAGGCTGGCTAAACAAGTG-3'; reverse 5'-GCAACAGCAGTGAAGGTG-3'.  $\beta$ -actin: forward 5'-GTGACGTGGACATCCGCAAA GAC-3' ; reverse: 5'-TCAAGAAAGGGTGTAACGCAACTAA-3'. Quantitative PCR was carried out in a Rotor-Gene 6000 centrifugal real-time cycler (Corbett Research, CA) using the kit of Platinum SYBR Green qPCR Super-Mix-UDG with ROX. The cycling conditions were as follows: initial denaturation at 95 °C for 2 min, followed by 45 cycles of 15 s at 95 °C, 30 s at 58 °C, and 30 s at 72 °C.

#### Western blotting

The cells were washed with ice-cold PBS and then lysed by buffer (50 mM Tris-Cl, 150mM NaCl, 100  $\mu$ g/ml phenylmethylsulfonyl fluoride, protease and phosphatase inhibitor cocktail from Roche and 1% Triton X-100) on ice for 30 min. After centrifugation at 12,000 g for 20min at 4 °C, the supernatant was used for western blot analysis as previous described.

#### Statistical analysis

All values are expressed as mean  $\pm$  standard error. Differences between control and target data sets were determined using independent sample t-tests, with P-values less than or equal to 0.05 being considered statistically significant.

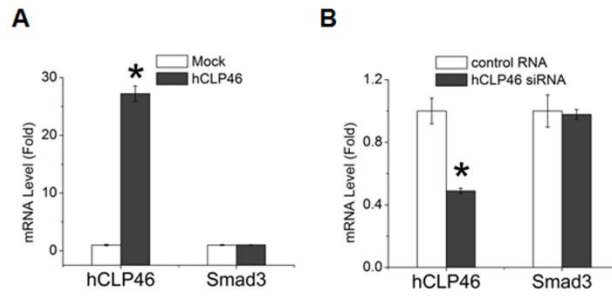

**Figure S1. The mRNA levels of Smad3 were not affected by hCLP46.** (A) After cultured for 24h, the mRNA levels of hCLP46 and Smad3 were examined by real-time RT-PCR in control or 0.5  $\mu\text{g/ml}$  Tet treated 293TRex-hCLP46 cells for 24h. (B) 293TRex Cells were transfected with control or hCLP46 specific siRNA for 72h and then mRNA levels of hCLP46 and Smad3 were determined. n=4 in each group. \* indicates  $p < .05$  comparing control and hCLP46 overexpressed or hCLP46 siRNA transfected cells.

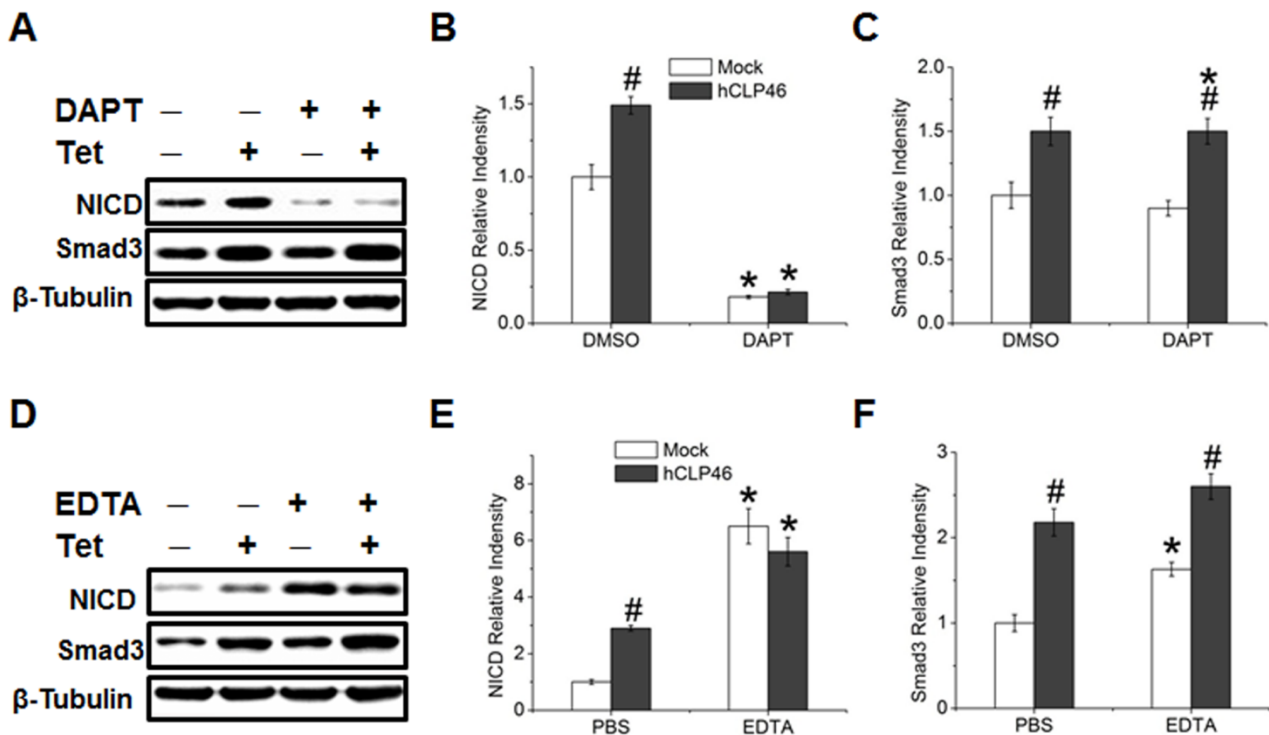

**Figure S2. The up-regulation of Smad3 induced by hCLP46 overexpression is not affected by Notch signaling.** 293TRex-hCLP46 cells were cultured in absence or presence of 0.5  $\mu\text{g/ml}$  Tet for

24h and 2  $\mu$ M DAPT or 0.5% DMSO were then added for 12h. Total cell lysates were probed for NICD and Smad3.  $\beta$ -Tubulin was used as a loading control (A-C). Or cells were treated with 5 mM EDTA or PBS for 30min, then replaced with fresh DMEM plus 10% FBS and cultured for additional 6h. Cell lysates were examined by western blot for NICD and Smad3 (D-F). Figures are chosen as the representative of three independent experiments. \* indicates  $p < .05$  comparing control and DAPT or EDTA treated cells. # indicates  $p < .05$  comparing control and hCLP46 overexpressed cells.

#### References

- Chu, Q., Liu, L., and Wang, W. (2013). Overexpression of hCLP46 enhances Notch activation and regulates cell proliferation in a cell type-dependent manner. *Cell Prolif* 46, 254-262.
- Ma, W., Du, J., Chu, Q., Wang, Y., Liu, L., Song, M., and Wang, W. (2011). hCLP46 regulates U937 cell proliferation via Notch signaling pathway. *Biochem Biophys Res Commun* 408, 84-88.
